# Supplementary material for: Induction of Secondary Metabolite Biosynthesis by Deleting the Histone Deacetylase HdaA in the Marine-Derived Fungus Aspergillus terreus RA2905
Source: MDPI journal article supplement (doi:10.3390/jof8101024), 2022-09-28
Supplement: s1 [file s1]

## List of Supporting Information

- Figure S1.**  $^1\text{H}$  NMR spectrum of compound **1** in methanol- $d_4$  (500 MHz).
- Figure S2.** Partial  $^1\text{H}$  NMR spectrum of compound **1** in methanol- $d_4$  (500 MHz).
- Figure S3.**  $^{13}\text{C}$  NMR spectrum of compound **1** in methanol- $d_4$  (125 MHz).
- Figure S4.**  $^1\text{H}$ - $^1\text{H}$  COSY spectrum of compound **1** in methanol- $d_4$ .
- Figure S5.** HSQC spectrum of compound **1** in methanol- $d_4$ .
- Figure S6.** HMBC spectrum of compound **1** in methanol- $d_4$ .
- Figure S7.** NOESY spectrum of compound **1** in methanol- $d_4$ .
- Figure S8.** HRESIMS spectrum (positive ion mode) of compound **1**.
- Figure S9.**  $^1\text{H}$  NMR spectrum of compound **2** in methanol- $d_4$  (500 MHz).
- Figure S10.** Partial  $^1\text{H}$  NMR spectrum of compound **2** in methanol- $d_4$  (500 MHz).
- Figure S11.**  $^{13}\text{C}$  NMR spectrum of compound **2** in methanol- $d_4$  (125 MHz).
- Figure S12.**  $^1\text{H}$ - $^1\text{H}$  COSY spectrum of compound **2** in methanol- $d_4$ .
- Figure S13.** HSQC spectrum of compound **2** in methanol- $d_4$ .
- Figure S14.** HMBC spectrum of compound **2** in methanol- $d_4$ .
- Figure S15.** NOESY spectrum of compound **2** in methanol- $d_4$ .
- Figure S16.** HRESIMS spectrum (positive ion mode) of compound **2**.
- Figure S17.** HPLC detection on ethyl acetate (EtOAc) extracts of  $\Delta hdaA$  strain (A) and WT strain (B).
- Figure S18.** CD curves of compounds **1** and **2**.
- Figure S19.** The PCR conditions for construction of mutant.

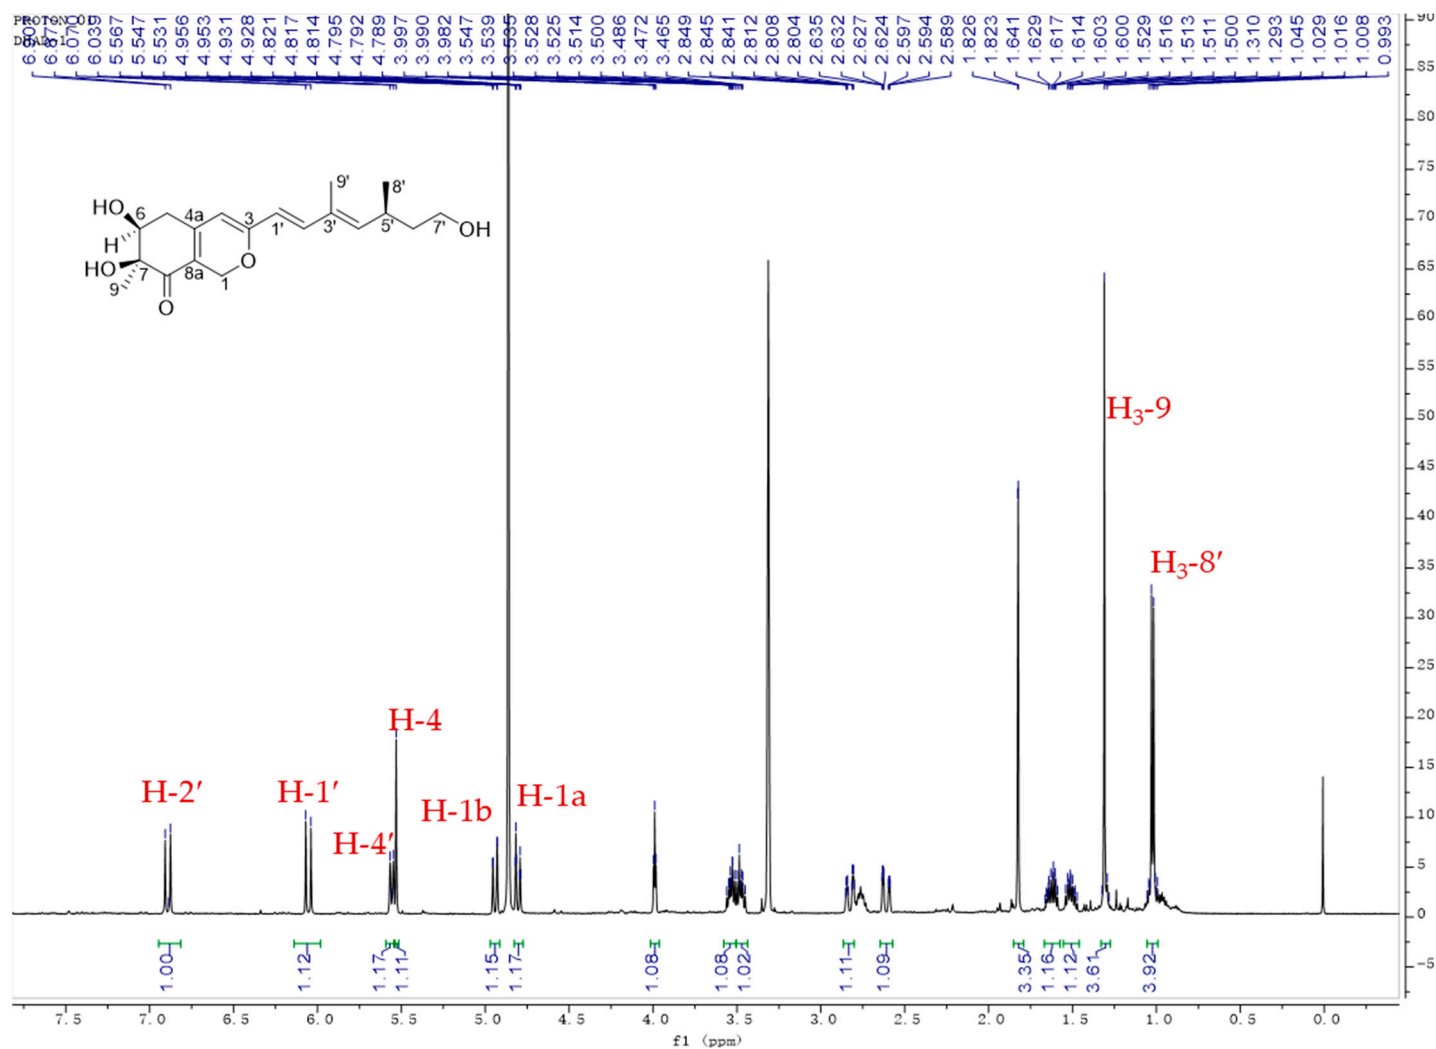

**Figure S1.**  $^1\text{H}$  NMR spectrum of compound **1** in methanol- $d_4$  (500 MHz).

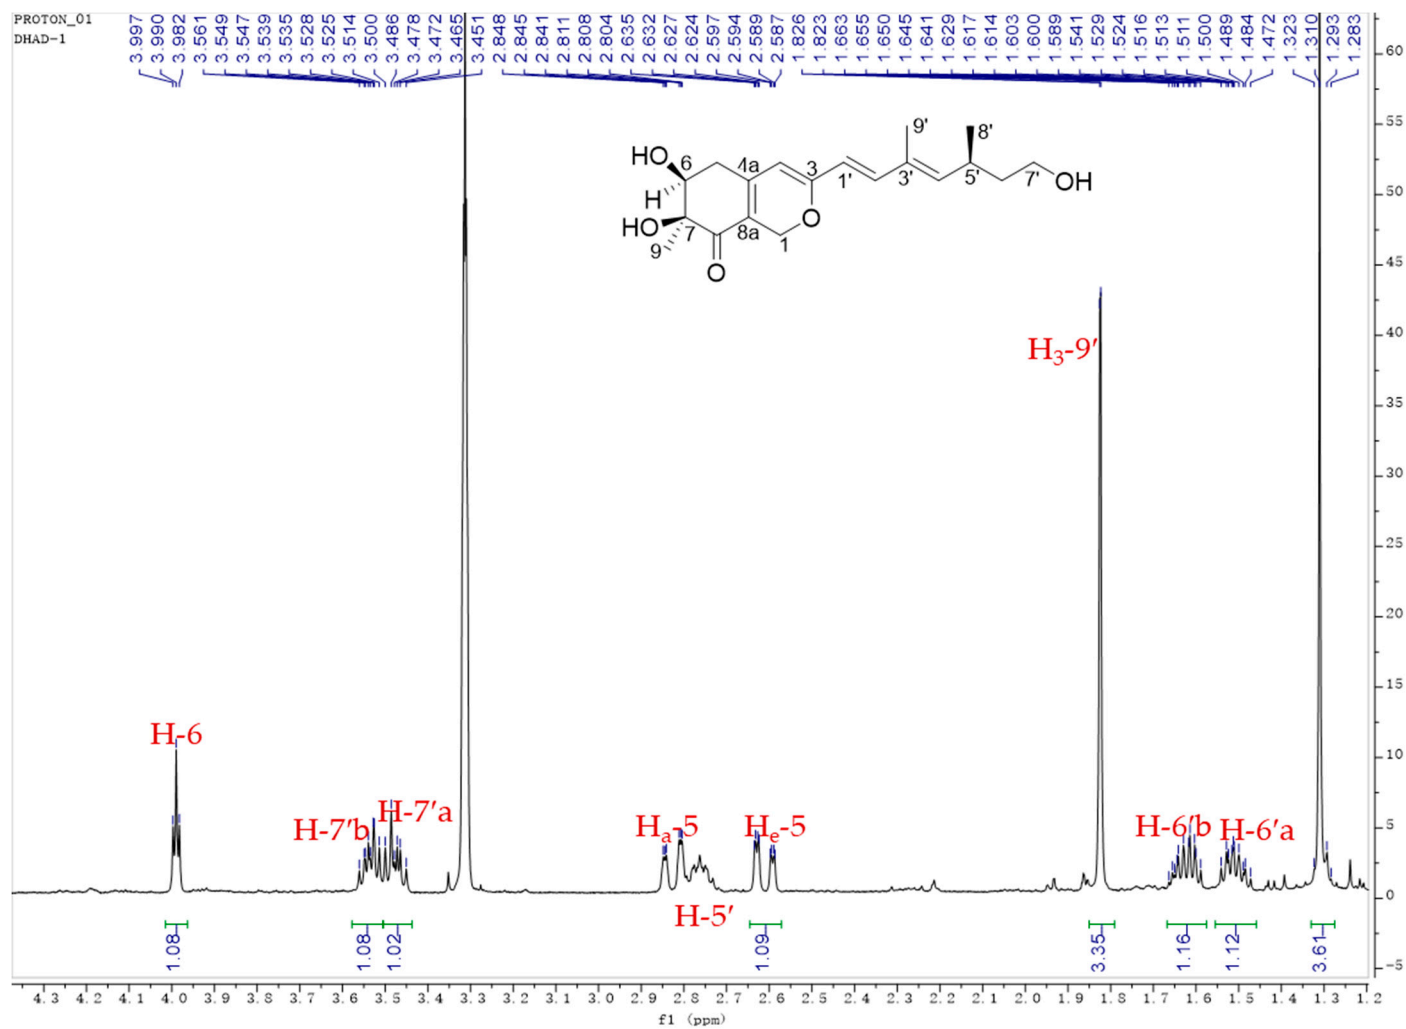

**Figure S2.** Partial  $^1\text{H}$  NMR spectrum of compound **1** in methanol- $d_4$  (500 MHz).

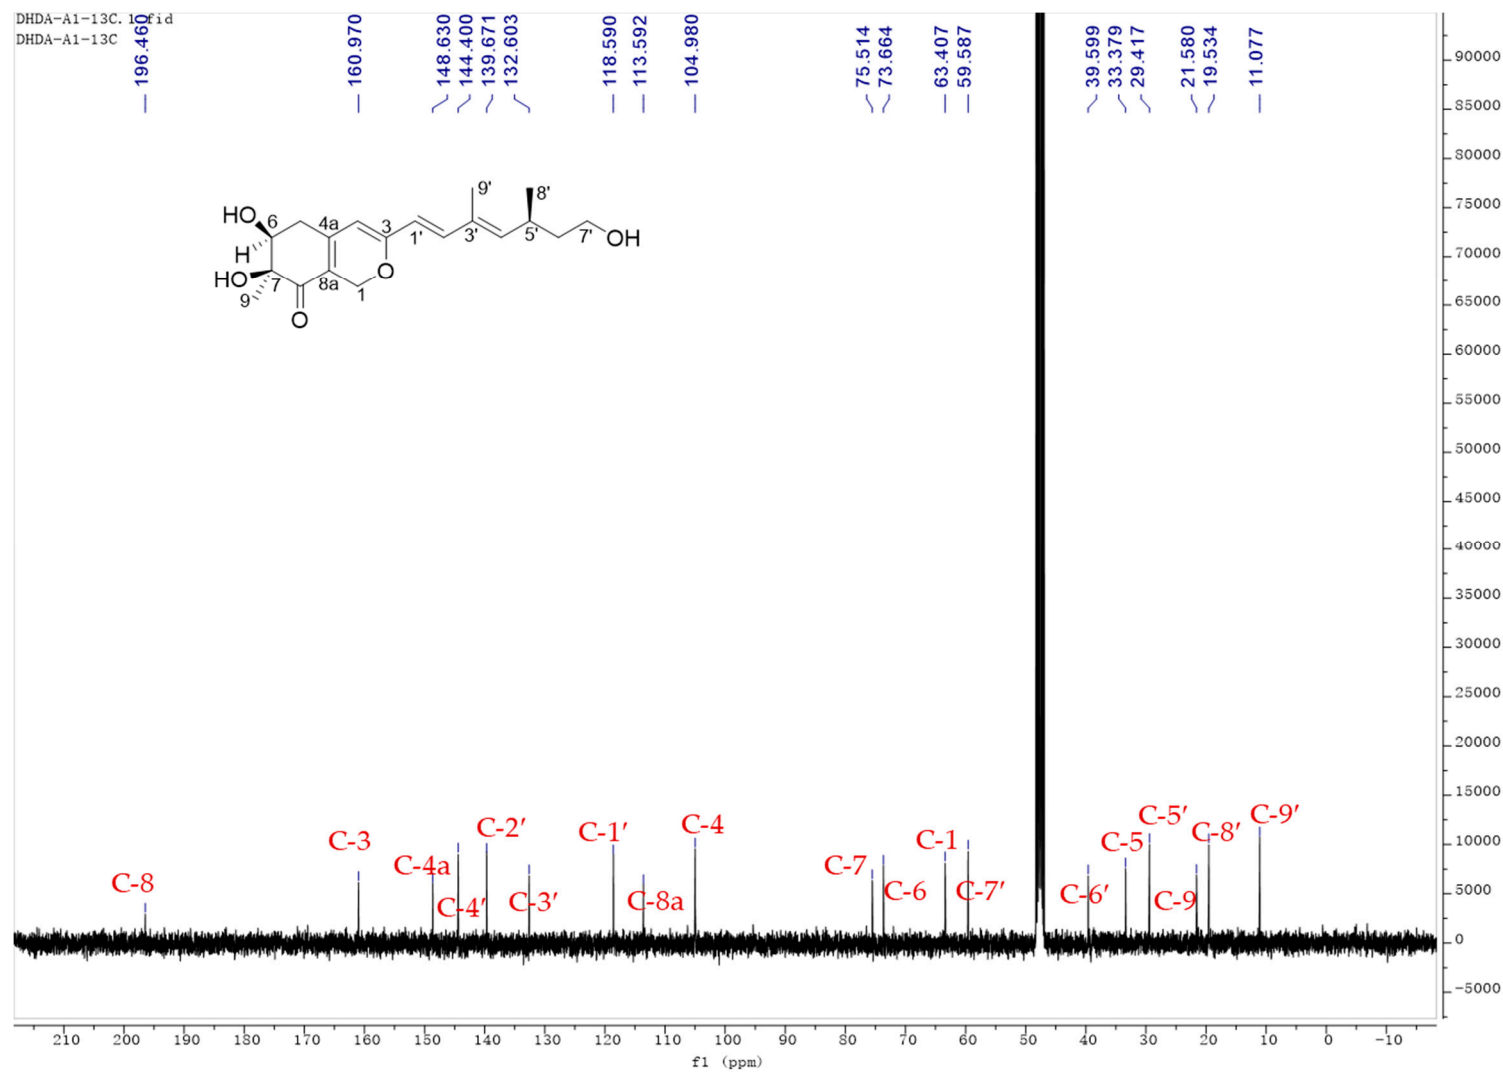

**Figure S3.**  $^{13}\text{C}$  NMR spectrum of compound **1** in methanol- $d_4$  (125 MHz).

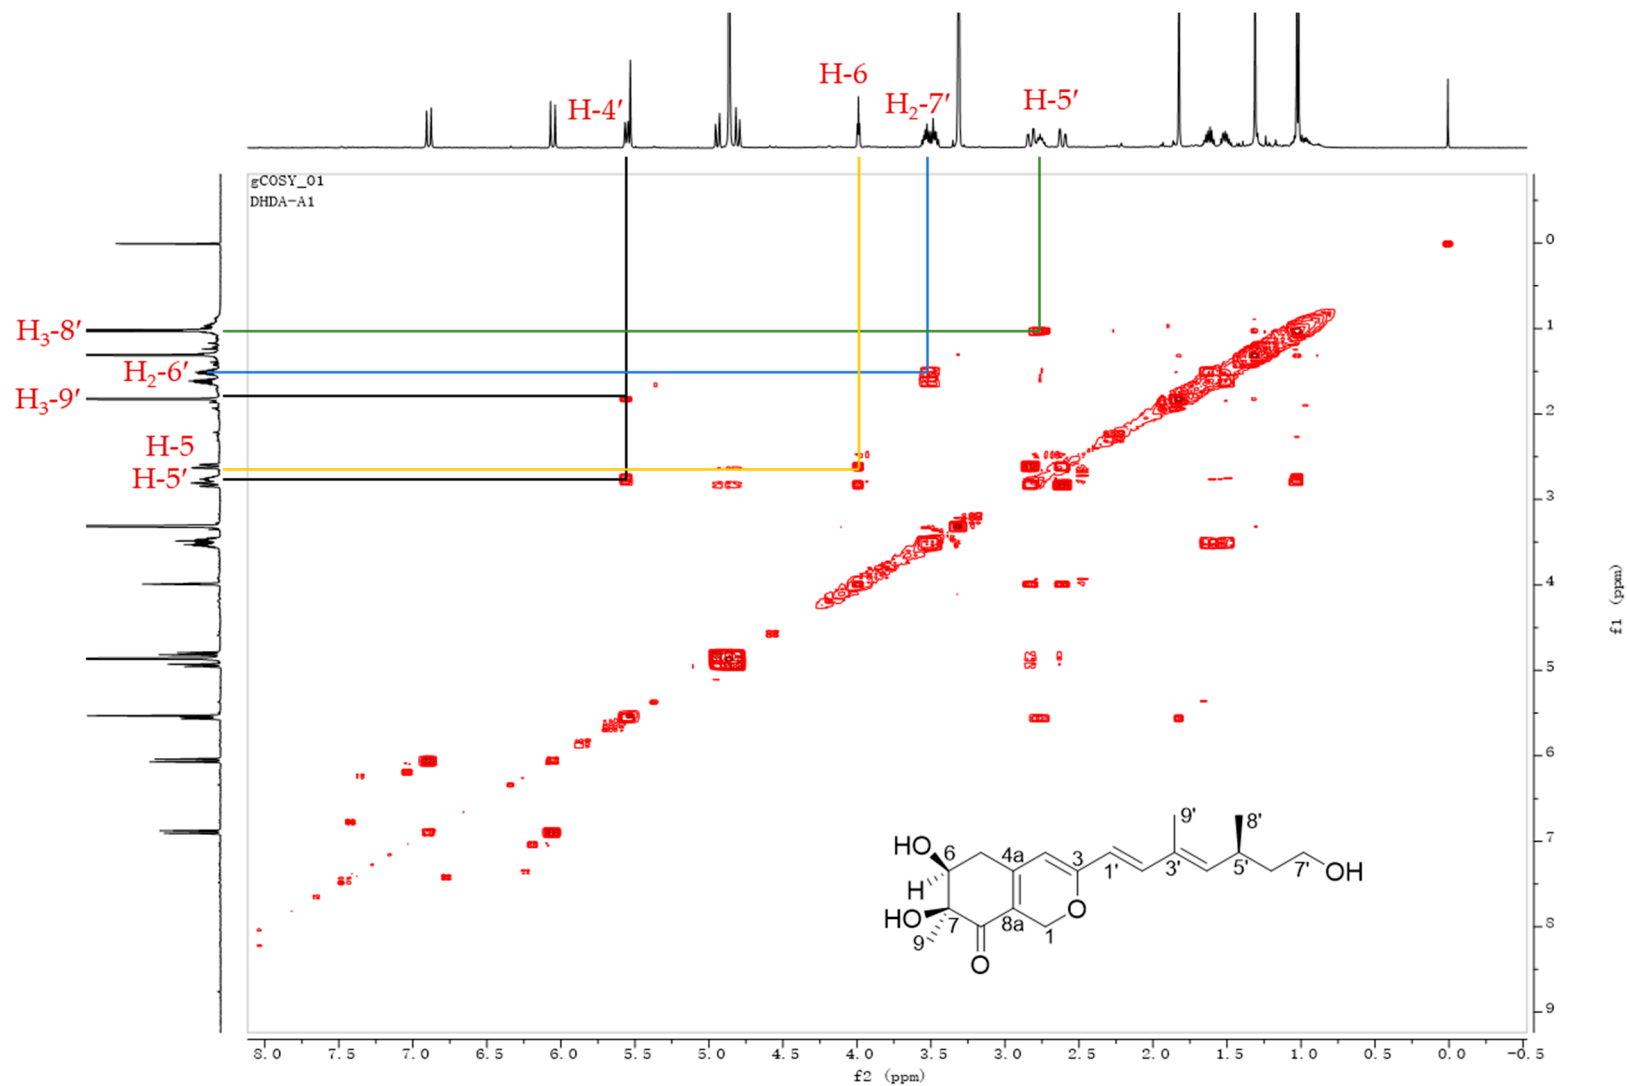

**Figure S4.**  $^1\text{H}$ - $^1\text{H}$  COSY spectrum of compound **1** in methanol- $d_4$ .

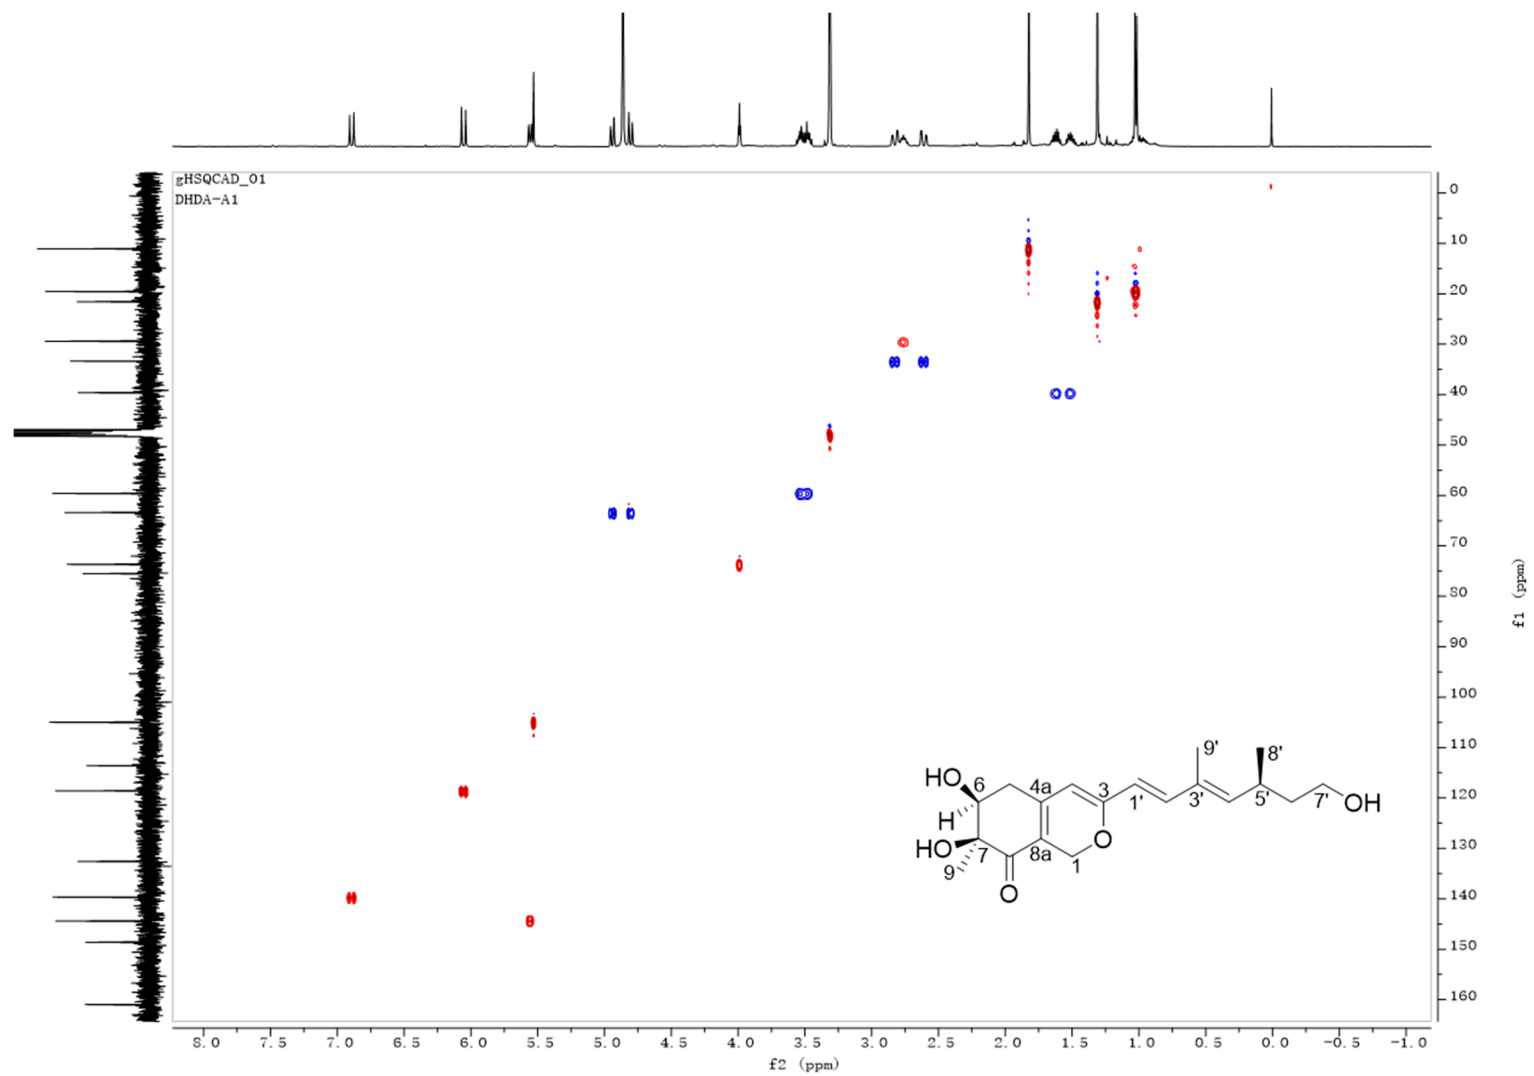

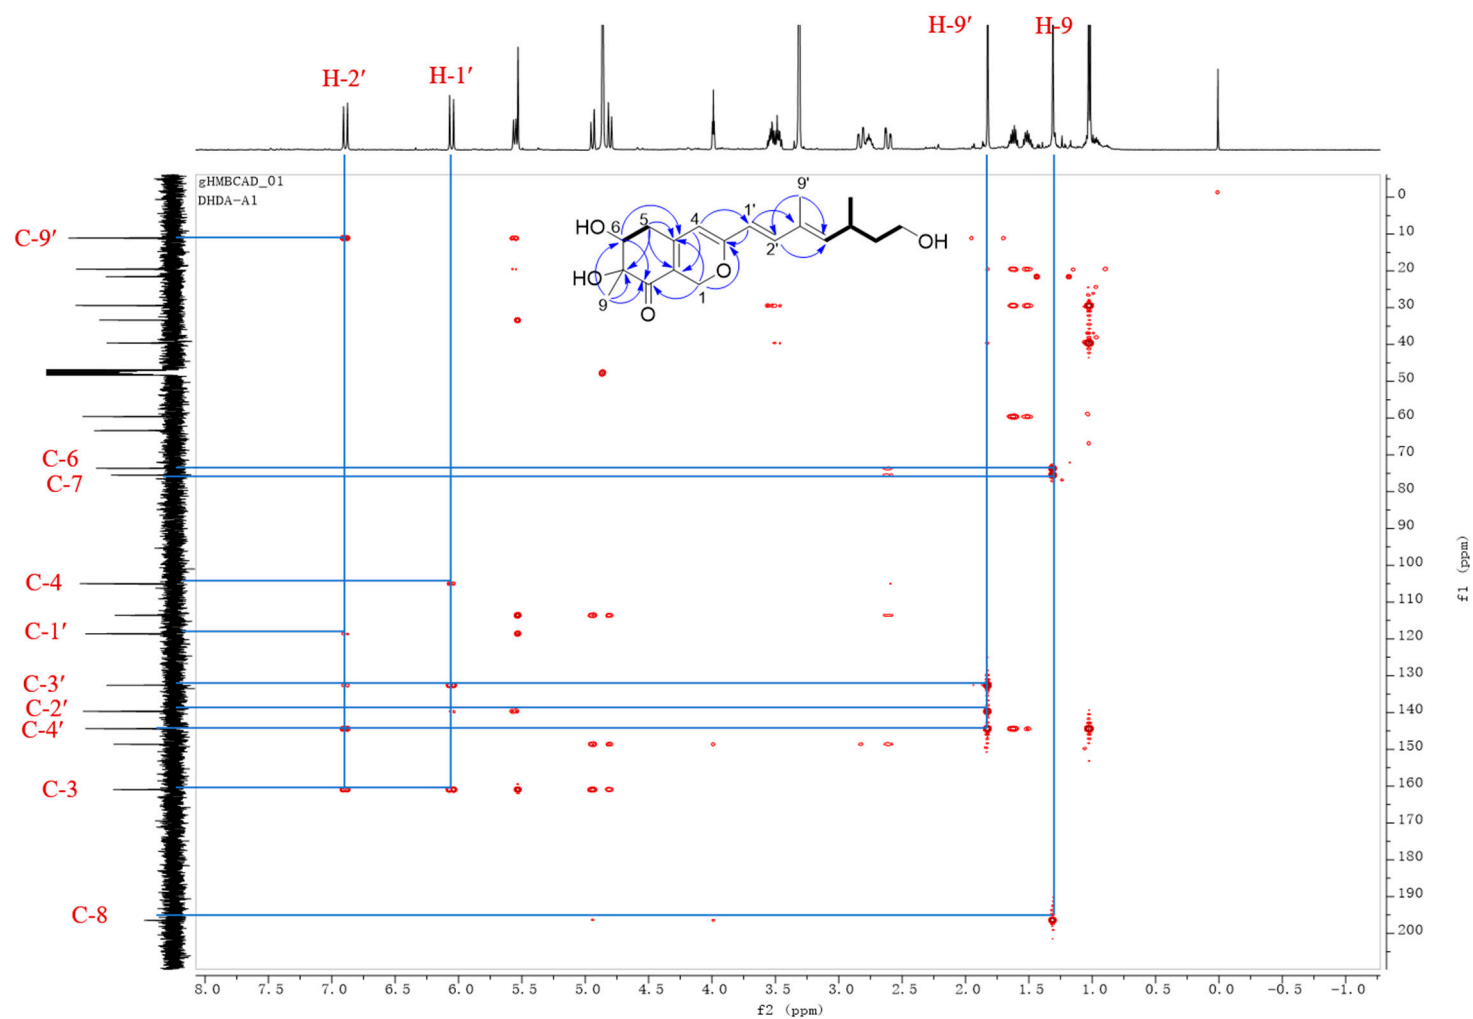

Figure S6. HMBC spectrum of compound 1 in methanol- $d_4$ .

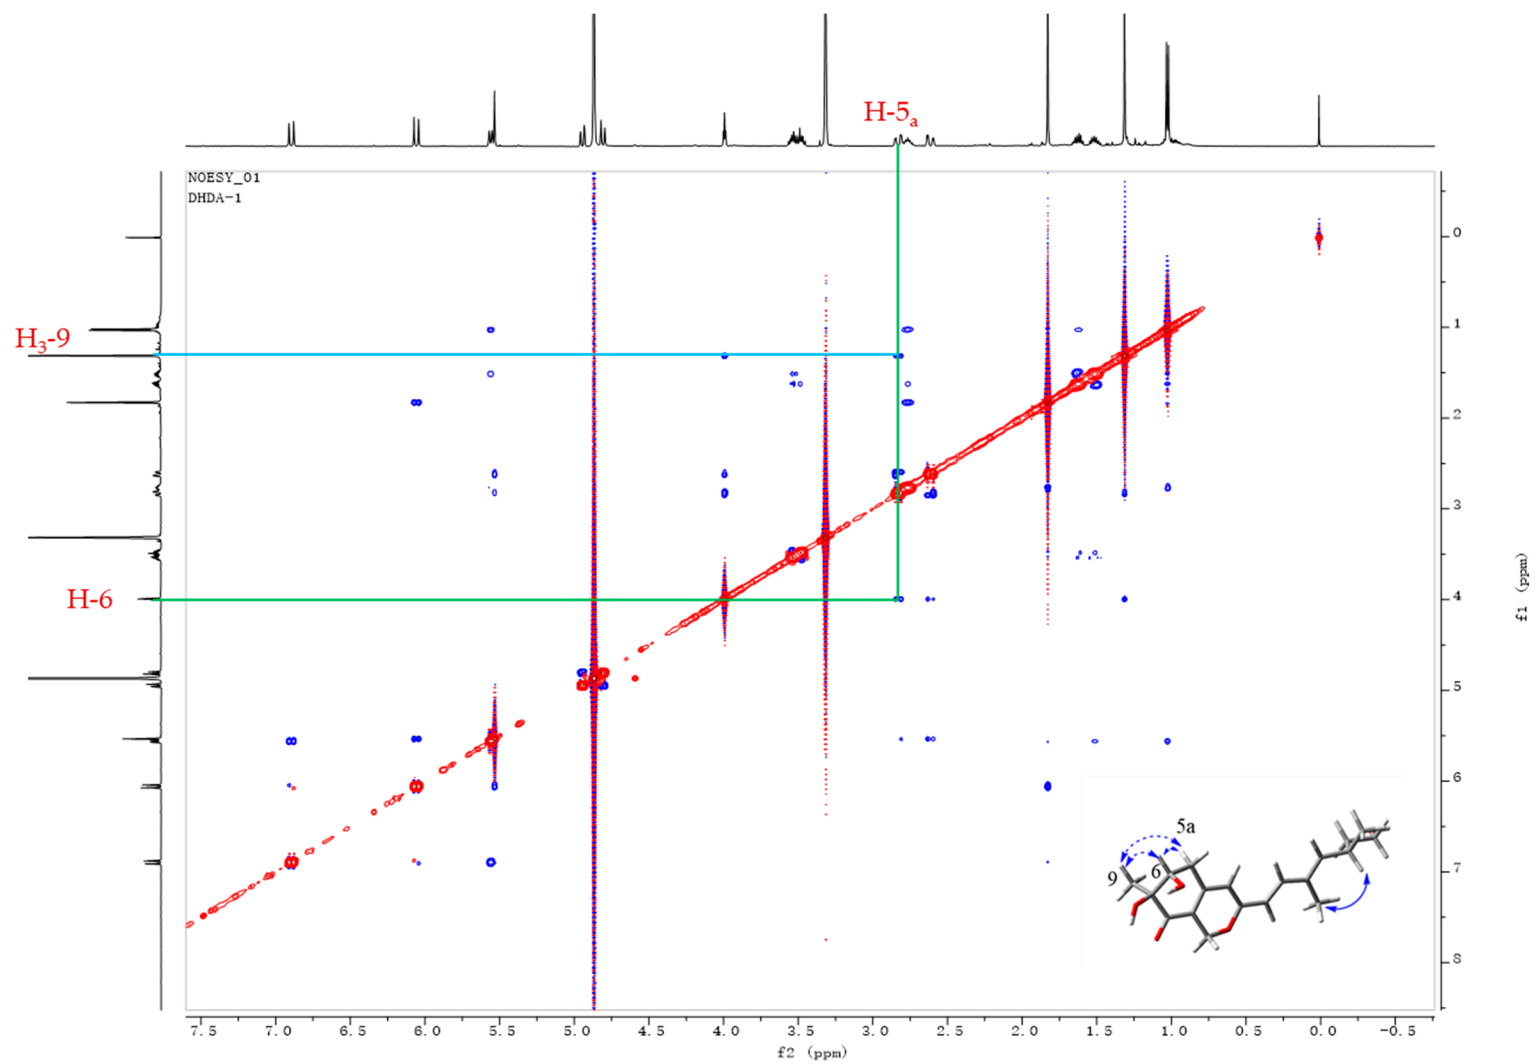

Figure S7. NOESY spectrum of compound **1** in methanol-*d*<sub>4</sub>.



20201112-DHDA1\_201112144855 #65 RT: 0.59 AV: 1 NL: 1.99E7  
T: FTMS + p ESI Full ms [150.00-2000.00]

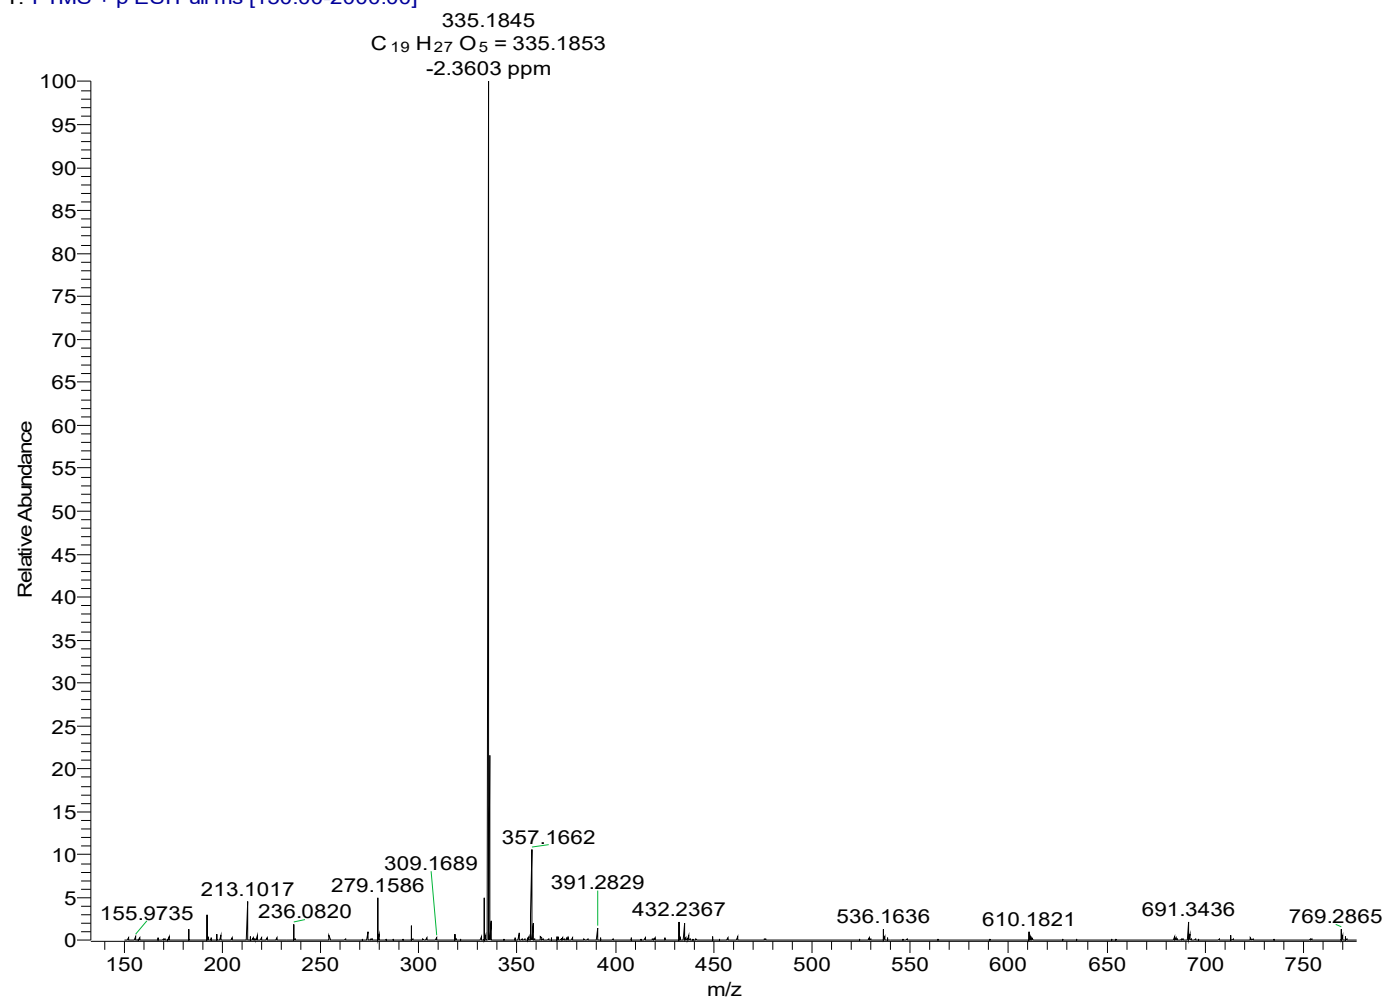

**Figure S8.** HRESIMS spectrum (positive ion mode) of compound **1**.





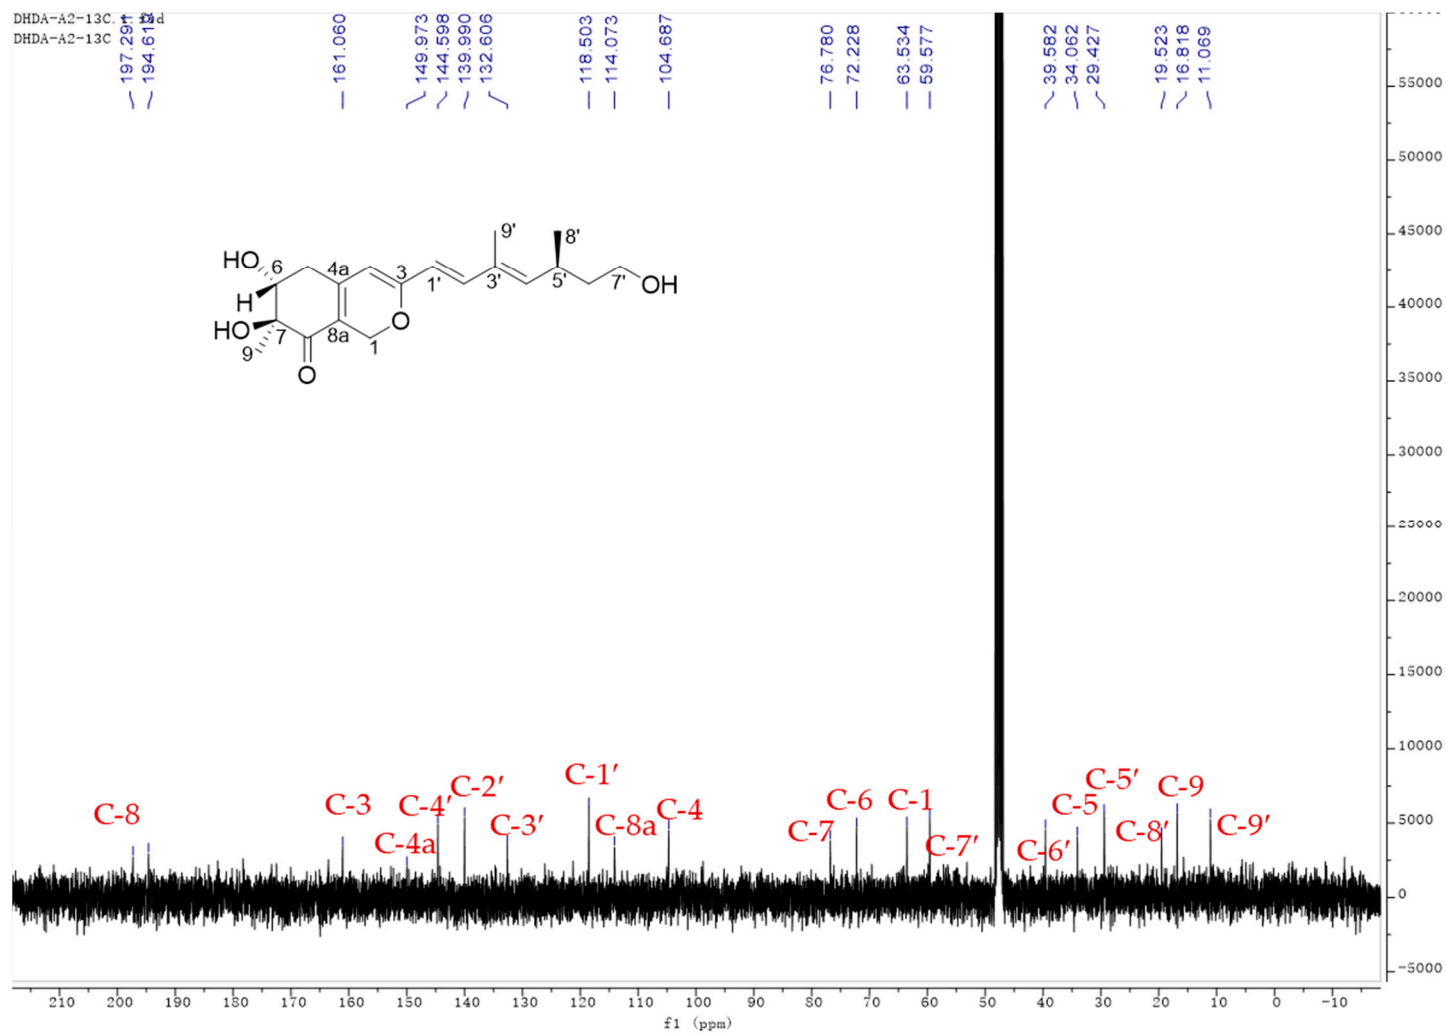

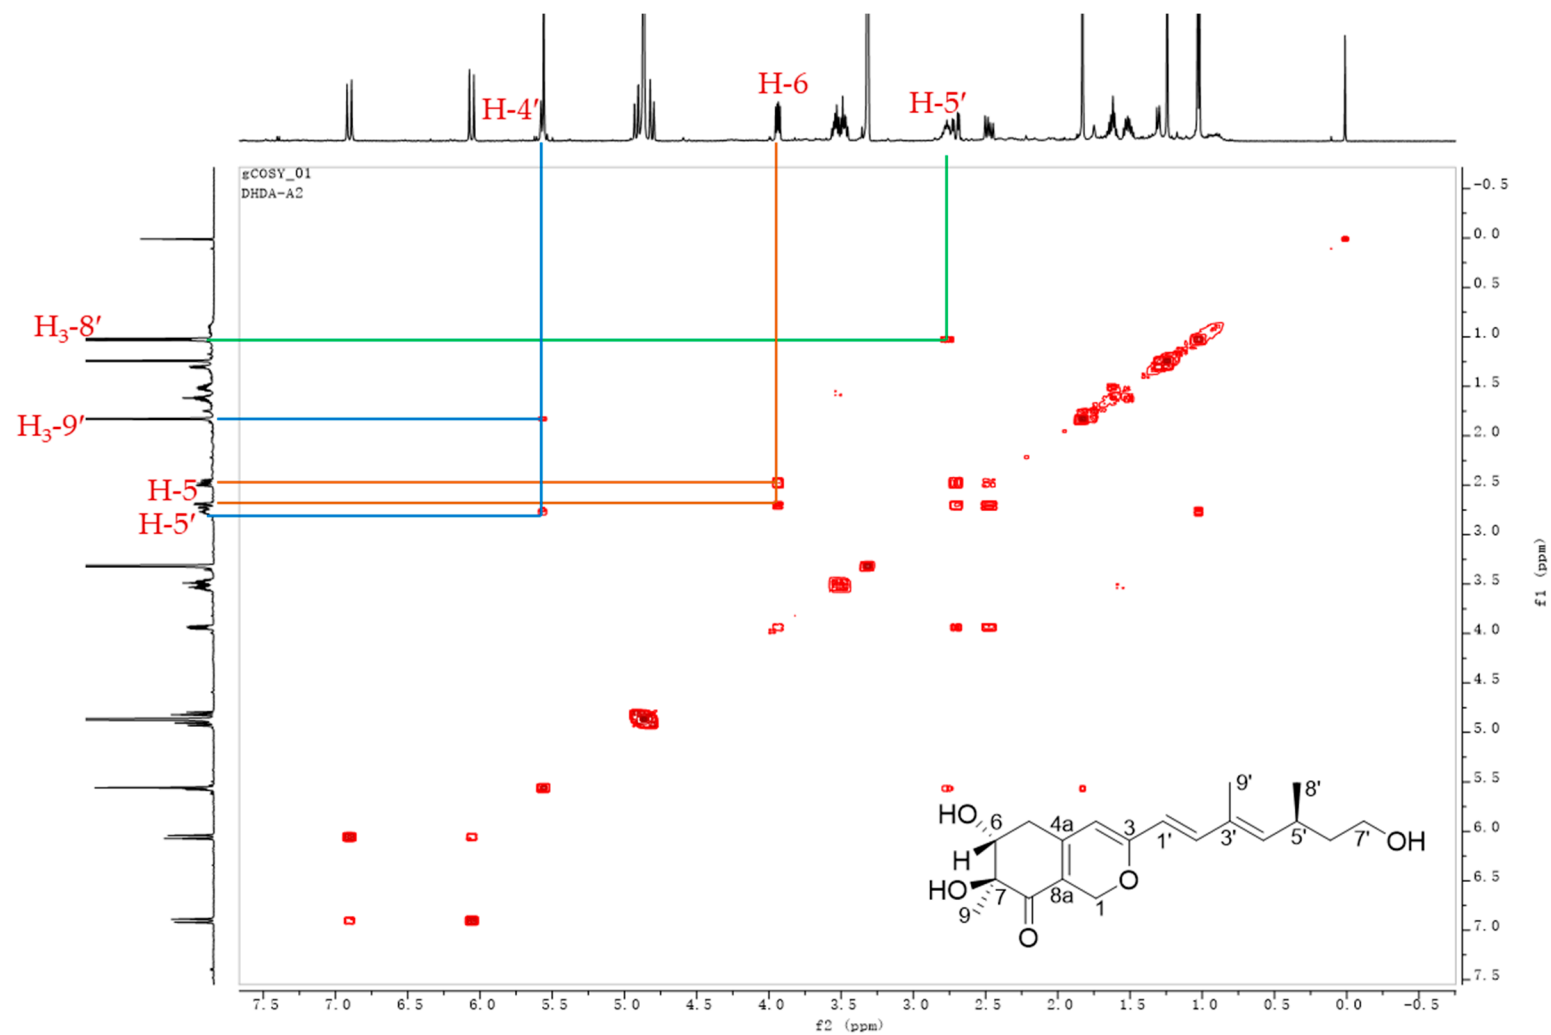

**Figure S12.**  $^1\text{H}$ - $^1\text{H}$  COSY spectrum of compound **2** in methanol- $d_4$ .

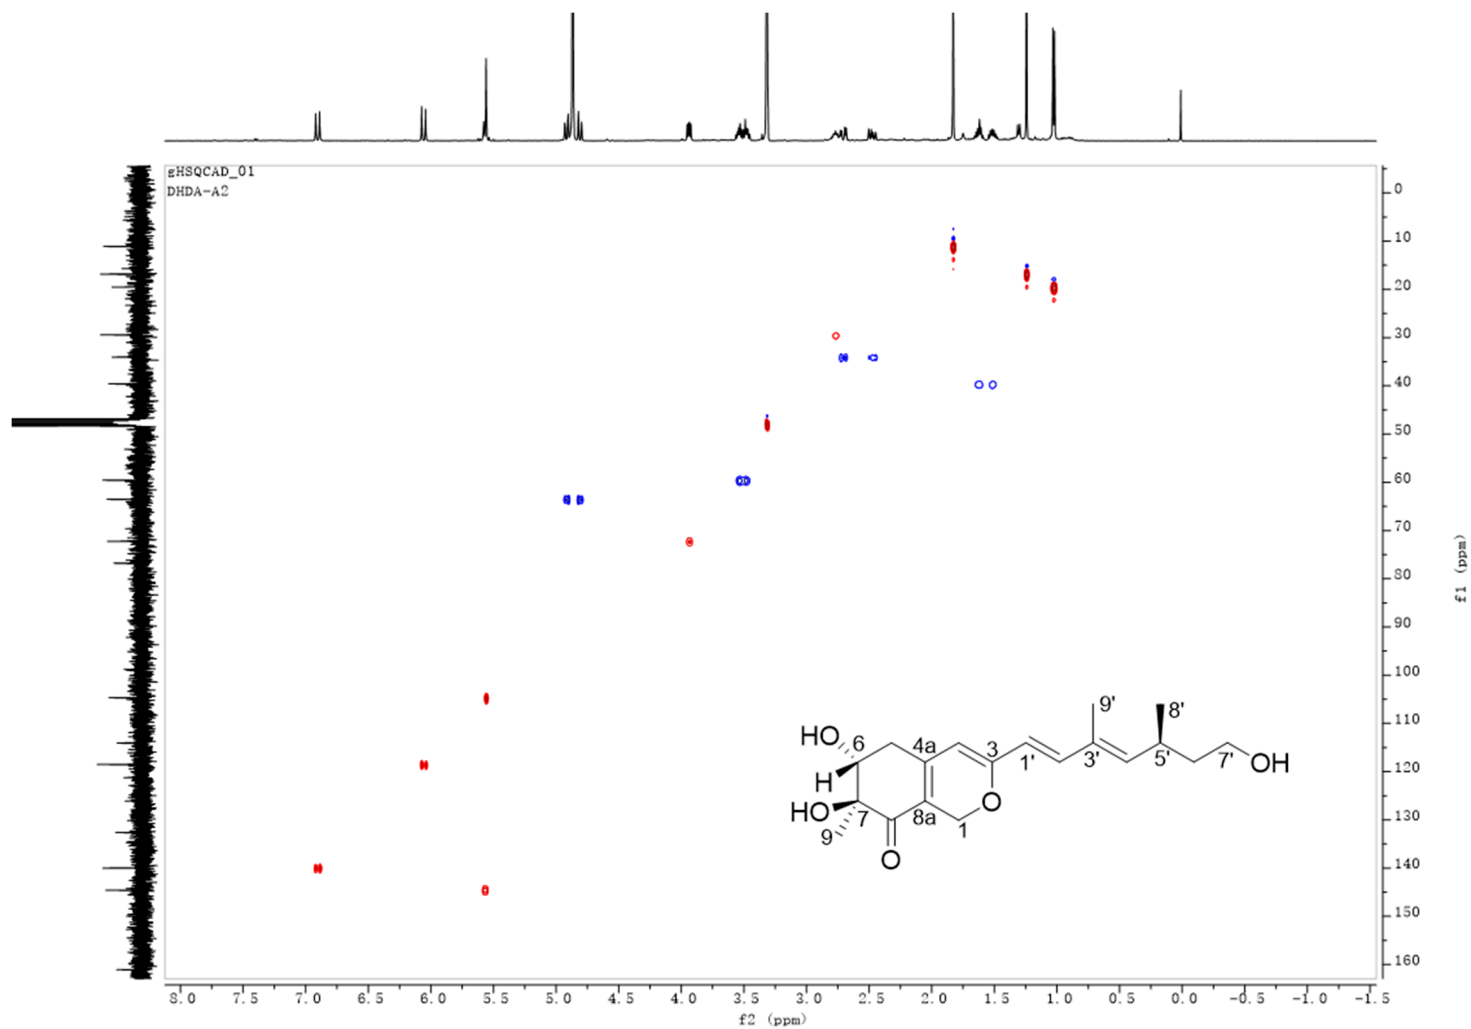

**Figure S13.** HSQC spectrum of compound **2** in methanol- $d_4$ .

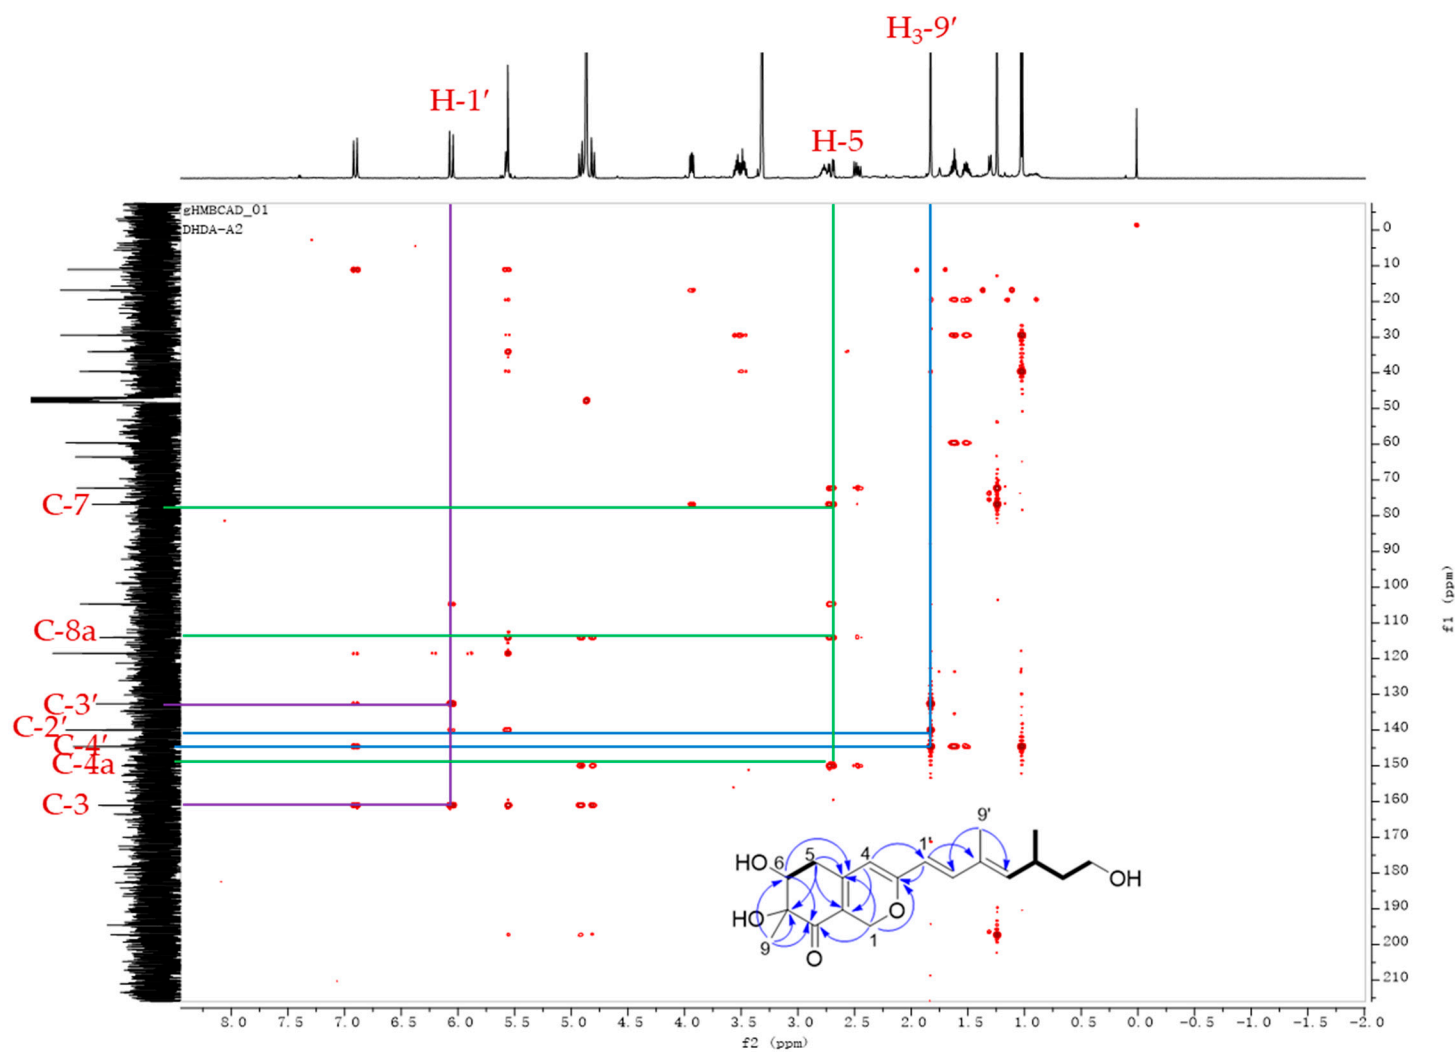

**Figure S14.** HMBC spectrum of compound **2** in methanol-*d*<sub>4</sub>.

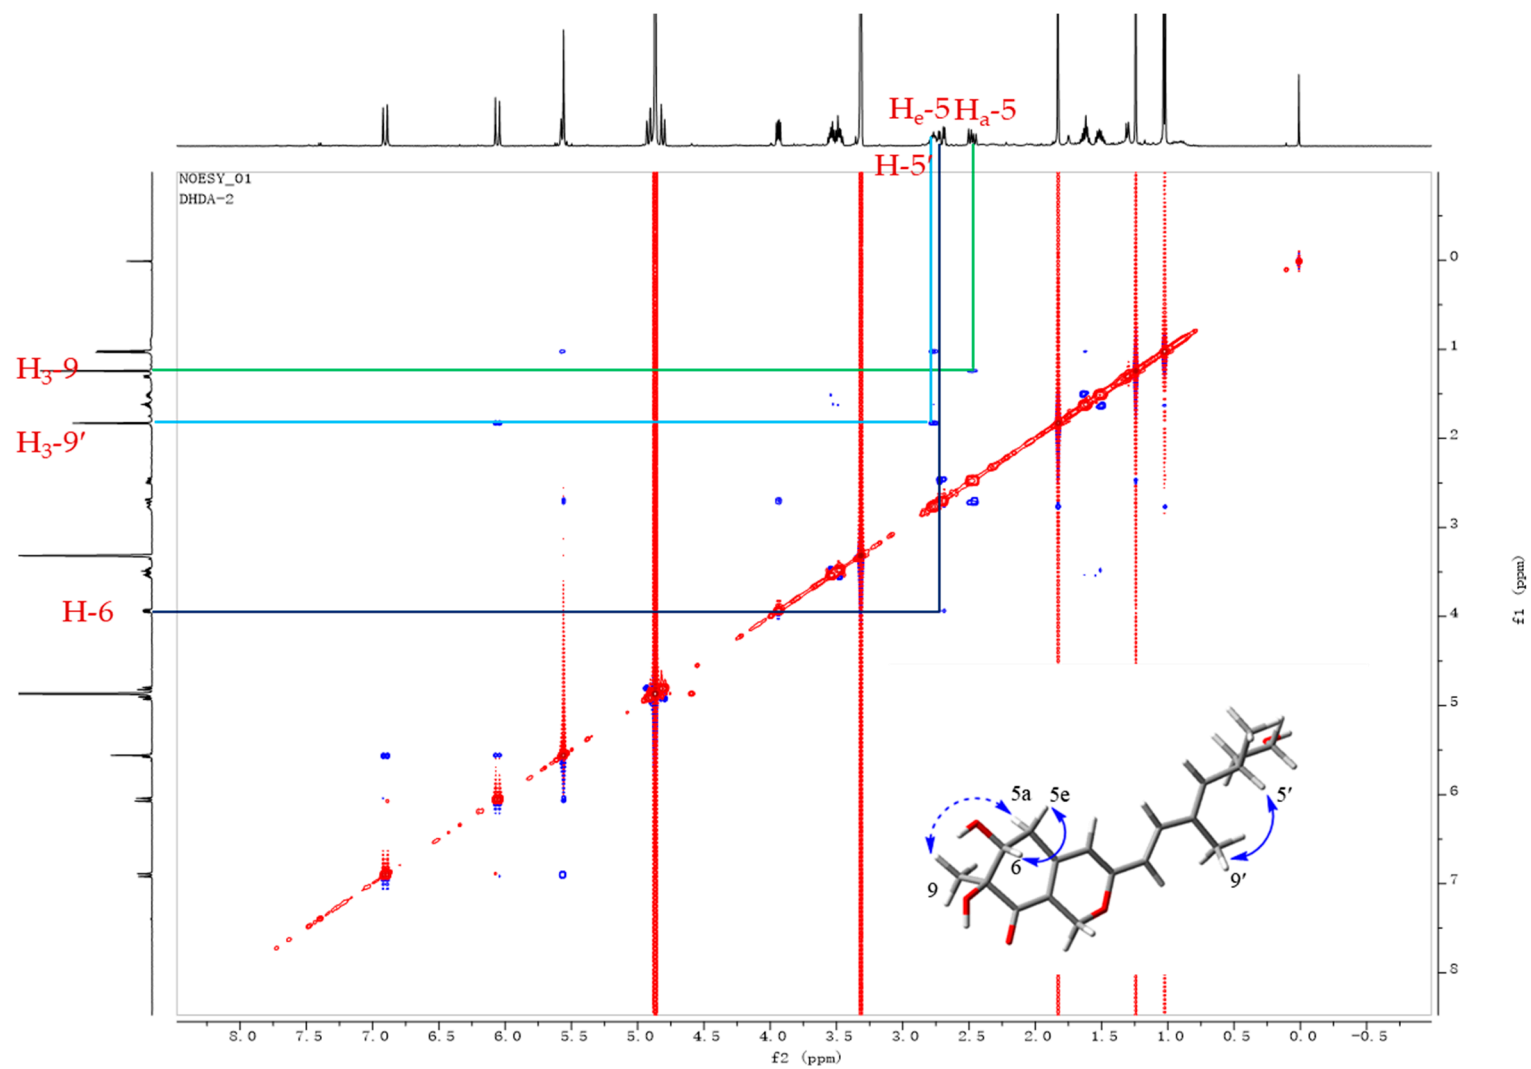

Figure S15. NOESY spectrum of compound **2** in methanol-*d*<sub>4</sub>.



20201112-DHDA2\_201112144855 #85-86 RT: 0.76-0.77 AV: 2 NL: 1.84E7  
T: FTMS + p ESI Full ms [150.00-2000.00]

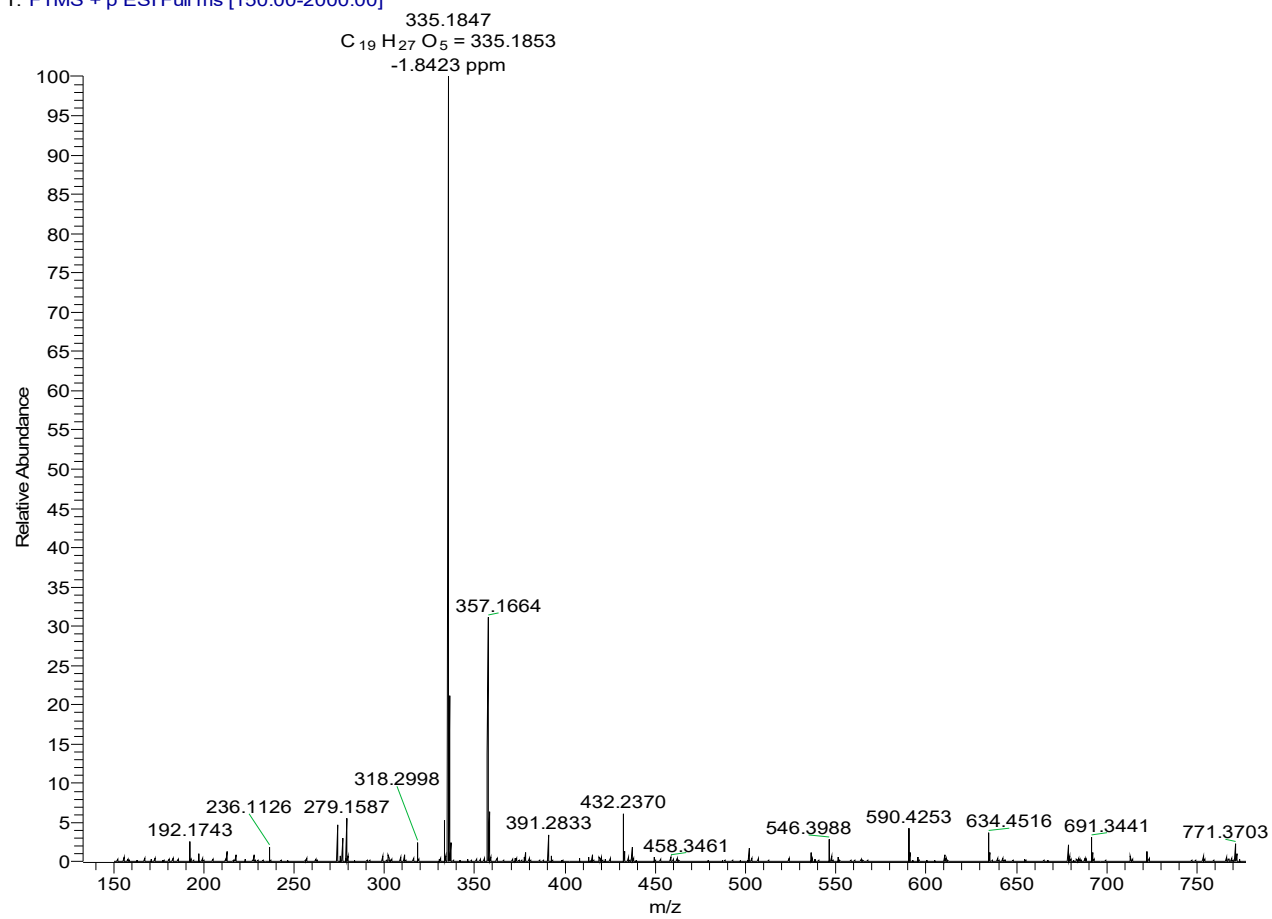

**Figure S16.** HRESIMS spectrum (positive ion mode) of compound **2**.

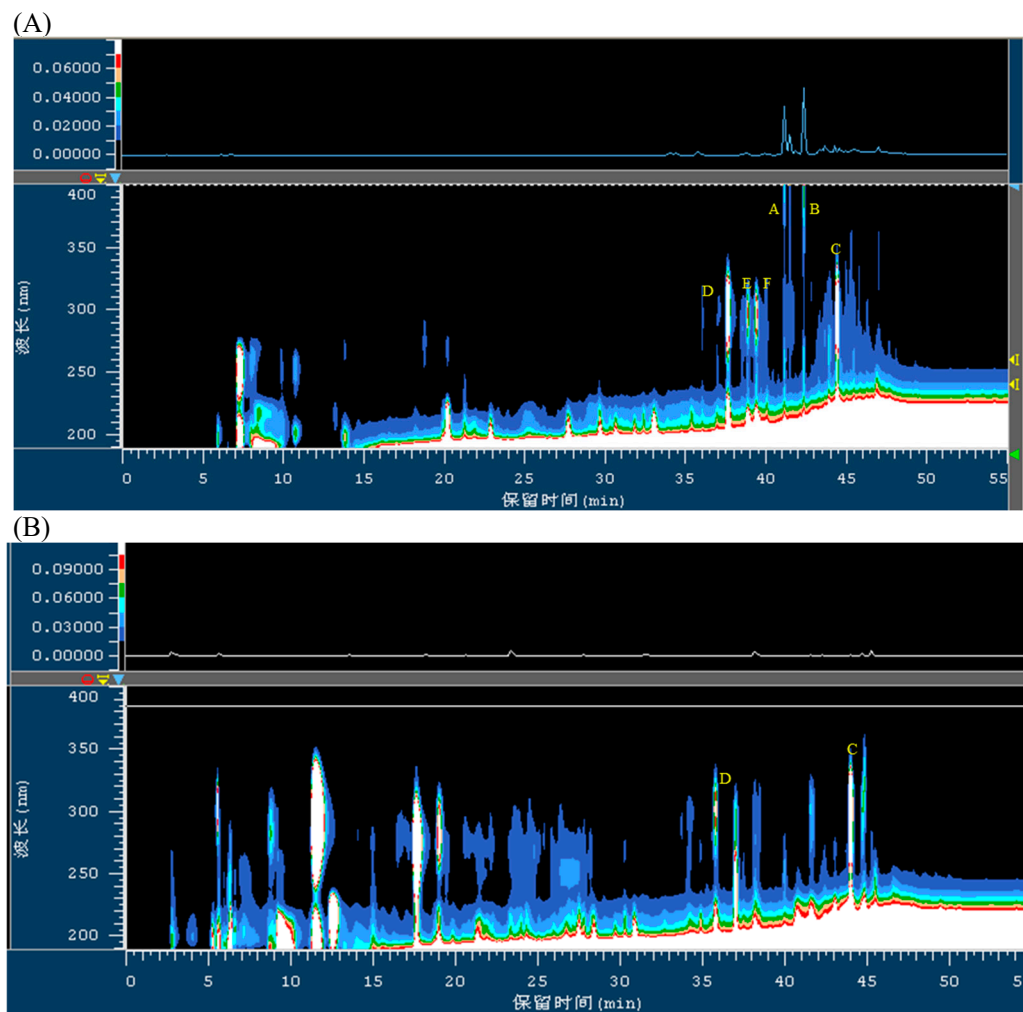

**Figure S17.** HPLC detection on ethyl acetate (EtOAc) extracts of  $\Delta hdaA$  strain (A) and WT strain (B). (The compounds were marked with yellow letter, A: asperterilone A; B: asperterilone B; C: butyrolactone I; D: butyrolactone II; E: butyrolactone III; F: butyrolactone V.)

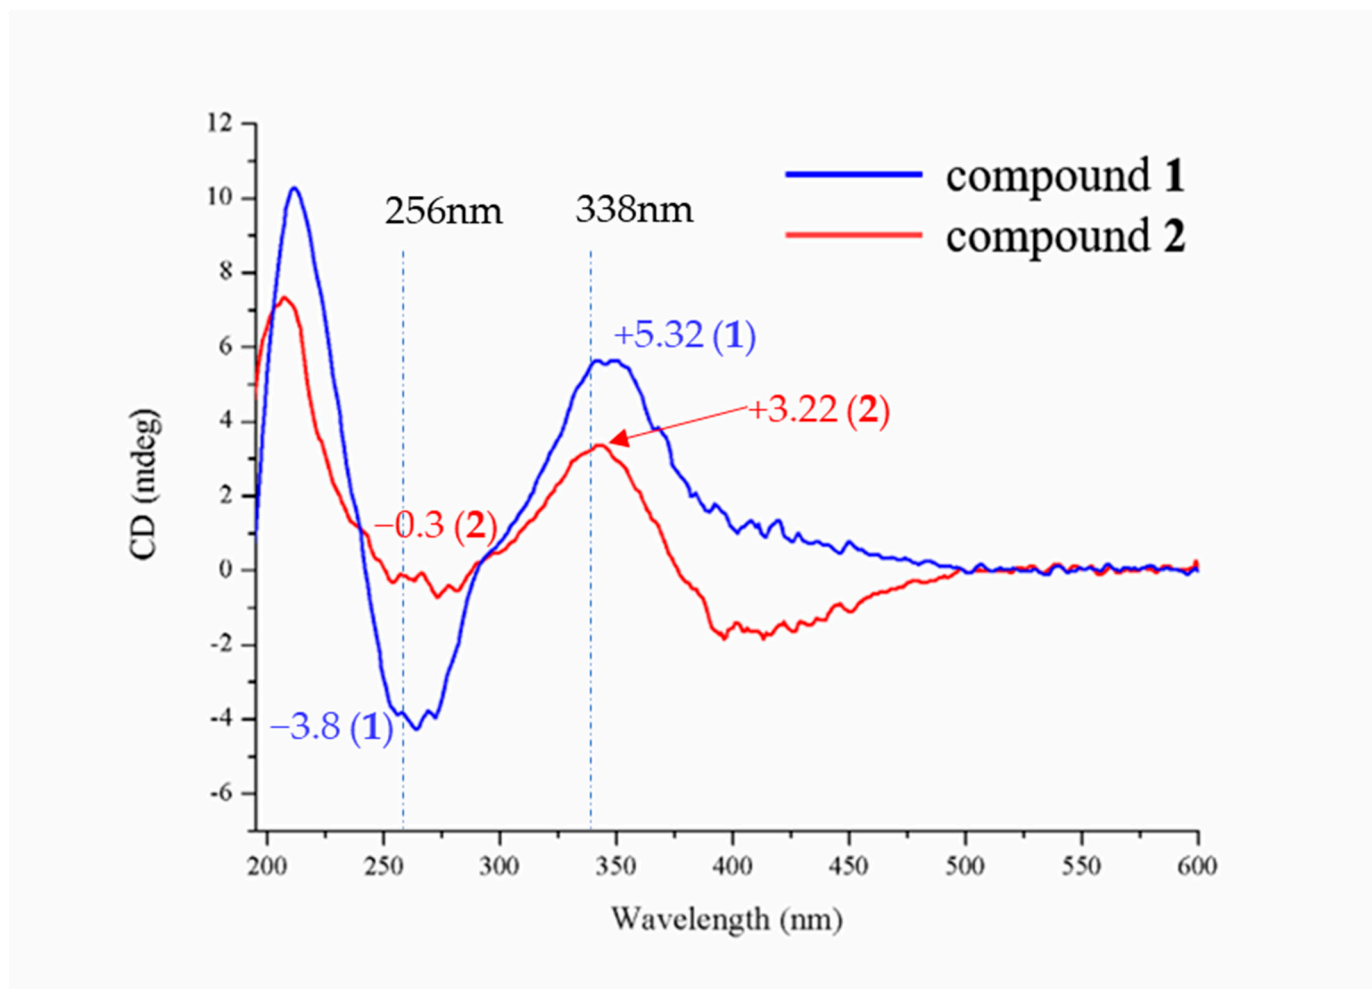

**Figure S18.** CD curves of compounds **1** and **2**. (The CD spectra of **1** and **2** showed positive [ +5.32 (**1**), +3.22 (**2**) at 338nm] and negative [−3.80 (**1**), −0.30 (**2**) at 256nm] Cotton effects)

#### General PCR process

|                  |       |        |             |
|------------------|-------|--------|-------------|
| Pre-denaturation | 95 °C | 2 min  | 1 cycle     |
| Denaturation     | 95 °C | 20 sec | } 30 cycles |
| Annealling       | 58 °C | 20 sec |             |
| Extension        | 72 °C | 1 min  |             |
| Extension        | 72 °C | 5 min  | 1 cycle     |

#### Fusion PCR process

|                  |       |        |             |
|------------------|-------|--------|-------------|
| Pre-denaturation | 95 °C | 2 min  | 1 cycle     |
| Denaturation     | 95 °C | 20 sec | } 12 cycles |
| Annealling       | 58 °C | 10 min |             |
| Extension        | 72 °C | 5 min  |             |
| Extension        | 72 °C | 5 min  | 1 cycle     |

**Figure S19.** The PCR conditions for construction of mutant. (The homologous arms of *hdaA* (upstream and downstream) and *hph* marker gene were amplified through general PCR process, the *hdaA* deletion cassette with three DNA fragments was constructed by fusion PCR.).
